# Supplementary material for: The Impact ofStaphylococcus aureus-Associated Molecular Patterns on Staphylococcal Superantigen-Induced Toxic Shock Syndrome and Pneumonia
Source: Hindawi journal article supplement (doi:10.1155/2014/468285), 2014-01-01

**Supplementary Fig 1.** Modulation of expression of HLA-DR3 and CD86 on DC by HKSA. Splenic mononuclear cells from HLA-DR3 transgenic mice were cultured with medium, HKSA ( $10^8$  bacteria/ml), SEB (1  $\mu$ g/ml) or SEB+HKSA. 24 hours later, the cells were harvested, washed and expression of HLA-DR3 and CD86 on CD11c<sup>+</sup> was analyzed by flow cytometry. Charts depict mean fluorescent intensity (MFI). Each bar represents mean $\pm$ SE from 2 different experiments.

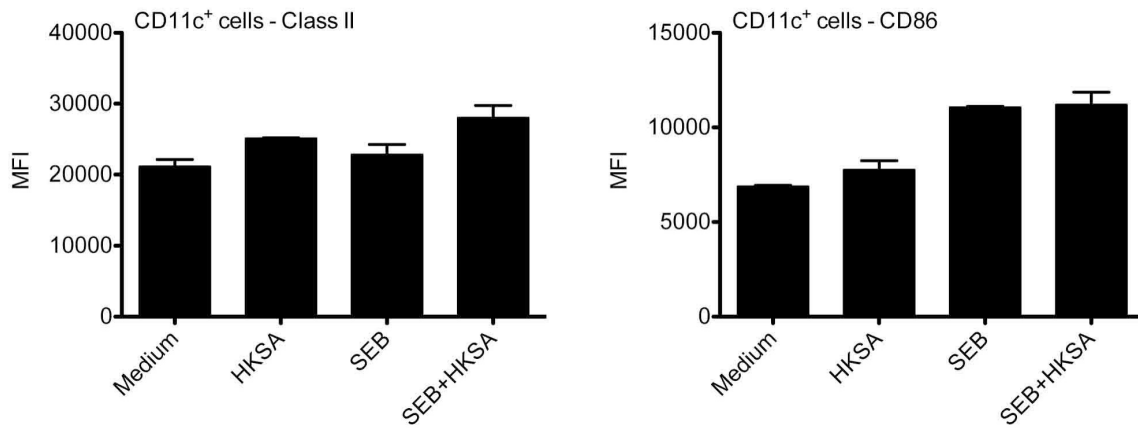

Supplement: f1 [file 468285.f1.pdf]
